# Supplementary material for: Cochlear Ribbon Synapses in Aged Gerbils
Source: MDPI journal article supplement (doi:10.3390/ijms25052738), 2024-02-27
Supplement: s1 [file s1]

**Table S1: List of individual specimens and number of IHC evaluated from each.**

Columns list, from left to right: Animal ID (publ = part of the dataset in Zhang et al., 2018), age, sex, numbers of IHCs evaluated from each of the three cochlear locations, and total number of IHCs evaluated from a given animal. Colored rows provide summary data for young-adult (blue), quiet-aged (orange), and all gerbils (gray).

| <b>gerbil (side)</b>        | <b>Age<br/>(days)</b>                  | <b>Age<br/>(months)</b> | <b>sex</b> | <b>2.51 mm<br/>1 kHz</b> | <b>3.8 mm<br/>2 kHz</b> | <b>8.13 mm<br/>16 kHz</b> | <b>Total<br/>IHCs</b> |
|-----------------------------|----------------------------------------|-------------------------|------------|--------------------------|-------------------------|---------------------------|-----------------------|
| <i>Young-adult gerbils:</i> |                                        |                         |            |                          |                         |                           |                       |
| AHG 14 (L)                  | 156                                    | 5.1                     | female     | 11                       | 10                      | 11                        | <b>32</b>             |
| FKSG 24 (R)                 | 228                                    | 7.5                     | female     |                          | 9                       | 9                         | <b>18</b>             |
| FKSG 25 (R)                 | 134                                    | 4.4                     | male       |                          | 9                       |                           | <b>9</b>              |
| GLCZ 3 (R) publ             | 80                                     | 2.6                     | female     |                          | 9                       | 10                        | <b>19</b>             |
| GLCZ 37 (R) publ            | 170                                    | 5.6                     | male       | 5                        | 5                       | 6                         | <b>16</b>             |
| GLCZ 41 (L) publ            | 205                                    | 6.7                     | male       | 7                        | 6                       |                           |                       |
| GLCZ 41 (R) publ            |                                        |                         |            |                          |                         | 4                         | <b>17</b>             |
| GLCZ 43 (L) publ            | 219                                    | 7.2                     | female     | 8                        | 7                       |                           |                       |
| GLCZ 43 (R) publ            |                                        |                         |            |                          |                         | 8                         | <b>23</b>             |
| OG 40 (L)                   | 319                                    | 10.5                    | female     | 10                       |                         |                           | <b>10</b>             |
| Olivia (R)                  | 273                                    | 9.0                     | female     | 10                       |                         |                           |                       |
| Olivia (L)                  |                                        |                         |            |                          |                         | 10                        | <b>20</b>             |
| <i>Total young-adult</i>    | <i>9 gerbils / 6 female, 3 male</i>    |                         |            | <b>51</b>                | <b>55</b>               | <b>58</b>                 | <b>164</b>            |
| <i>Quiet-aged gerbils</i>   |                                        |                         |            |                          |                         |                           |                       |
| AddG 19 (L)                 | 1242                                   | 40.8                    | male       | 8                        | 11                      | 5                         | <b>24</b>             |
| AHG 10 (L)                  | 1163                                   | 38.2                    | female     | 8                        |                         |                           | <b>8</b>              |
| AHG 24 (R)                  | 1264                                   | 41.6                    | male       | 8                        | 9                       |                           | <b>17</b>             |
| AHG 25 (R)                  | 1260                                   | 41.4                    | female     | 9                        | 9                       | 9                         | <b>27</b>             |
| AHG 29 (R)                  | 1170                                   | 38.5                    | male       | 9                        |                         |                           | <b>9</b>              |
| FKSG 27 (R)                 | 1096                                   | 36.0                    | female     |                          |                         | 9                         | <b>9</b>              |
| FKSG 29 (L)                 | 1158                                   | 38.1                    | male       |                          | 10                      | 11                        |                       |
| FKSG 29 (R)                 |                                        |                         |            | 8                        |                         |                           | <b>29</b>             |
| FKSG 30 (R)                 | 1151                                   | 37.8                    | male       |                          | 9                       | 7                         | <b>16</b>             |
| FKSG 32 (R)                 | 1096                                   | 36.0                    | male       |                          | 9                       | 8                         | <b>17</b>             |
| Geowaz (L)                  | 1172                                   | 38.5                    | male       | 8                        |                         |                           | <b>8</b>              |
| Magneton (L)                | 1212                                   | 39.8                    | male       | 10                       |                         | 11                        | <b>21</b>             |
| Simsala (R)                 | 1200                                   | 39.5                    | female     |                          | 9                       |                           | <b>9</b>              |
| Turtok (L)                  | 1269                                   | 41.7                    | male       |                          | 9                       | 9                         | <b>18</b>             |
| <i>Total quiet-aged</i>     | <i>13 gerbils / 4 female, 9 male</i>   |                         |            | <b>68</b>                | <b>75</b>               | <b>69</b>                 | <b>212</b>            |
| <b>Total</b>                | <b>22 gerbils / 10 female, 12 male</b> |                         |            | <b>119</b>               | <b>130</b>              | <b>127</b>                | <b>376</b>            |
